# Supplementary material for: Point-of-Care Using Vis-NIR Spectroscopy for White Blood Cell Count Analysis
Source: MDPI journal article supplement (doi:10.3390/chemosensors10110460), 2022-11-05
Supplement: s1 [file s1]

supplementary

## Point-of-Care Using Vis-NIR Spectroscopy for White Blood Cell Count Analysis

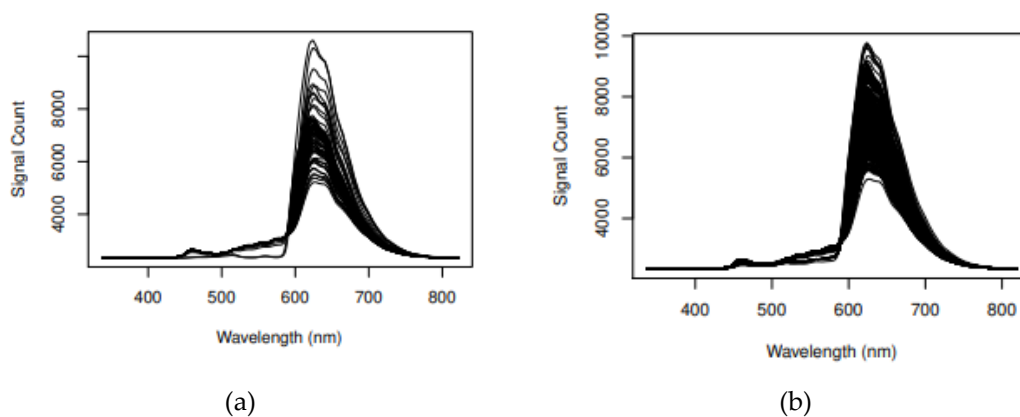

**Figure S1.** Dog blood spectra: (a) real-world samples and (b) sythetic samples obtained by 640 mixture of two samples spectra.
